# Supplementary material for: Impact of Genetic Variations on Thromboembolic Risk in Saudis with Sickle Cell Disease
Source: MDPI journal article supplement (doi:10.3390/genes14101919), 2023-10-09
Supplement: s1 [file s1]

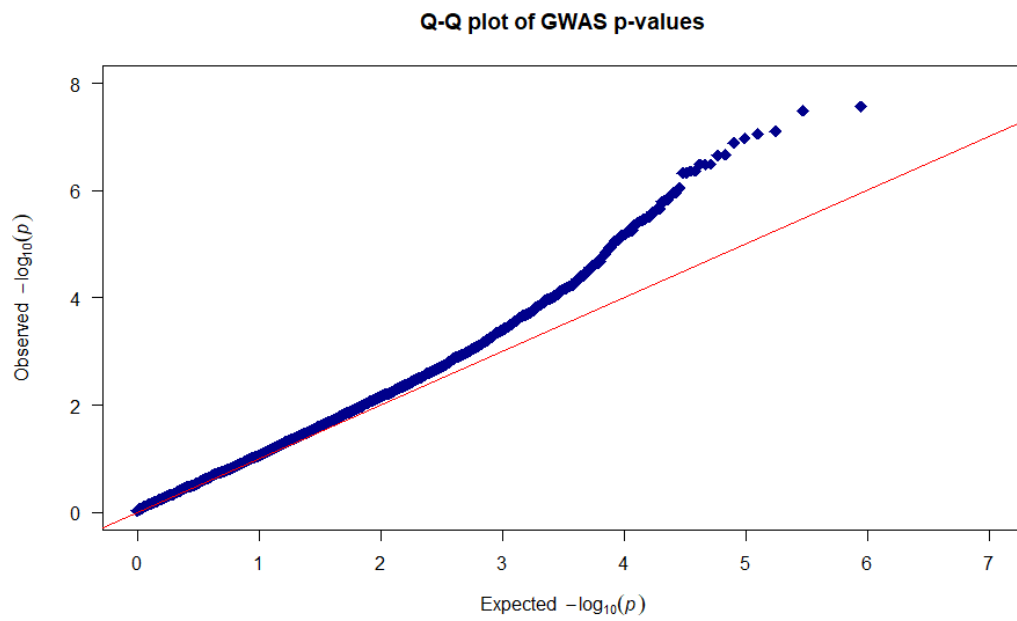

**Supplementary Figure S1:** GWAS results plot of SCD cohort (65 TEE cases vs 285 controls). Q–Q plot of the observed and expected P-values generated from an allelic genetic model which involved a set of 683,030 variants. The expected values plot is shown in red in comparison to the observed values plot in blue.
