# Supplementary material for: Impact of Genetic Variations on Thromboembolic Risk in Saudis with Sickle Cell Disease
Source: Genes (Basel). 2023 Oct 9;14(10):1919. doi: 10.3390/genes14101919 (PMC10606407; doi:10.3390/genes14101919)
Supplement: Supplementary file 1 [file genes-14-01919-s001.zip › Supplementary Excel Sheet S1.xlsx]

## Sheet: LD of 27 SNPs
Linkage disequilibrium between SNPs associated with TEE (n=65) in SCD among the Saudis
CHR_A	BP_A	SNP_A	CHR_B	BP_B	SNP_B	R2
11	5597953	rs10684957	11	5585716	rs16932946	0.611611
			11	5622664	rs4910823	0.719262
			11	5587409	rs967664	0.878275
			11	5608295	rs4910572	0.888313
11	5130337	rs11035718	11	5117707	rs2499942	0.763054
			11	5153261	rs2472530	0.8495	a missense variant in OR52A5
			11	5127136	rs1455957	0.902572
7	53127559	rs1174864	7	53141991	rs1174746	0.633632
11	4871506	rs1368823	11	4852104	rs10592613	0.685736
			11	4868158	rs11821302	0.727534
11	5127136	rs1455957	11	5153261	rs2472530	0.774326	a missense variant in OR52A5
			11	5117707	rs2499942	0.842805
			11	5130337	rs11035718	0.902572
4	4523198	rs16835830	4	4534660	rs59993629	0.684291
			4	4538898	rs4689878	0.832119
11	5264146	rs2071348	11	5271739	rs73402629	0.780447
			11	5273060	rs73402631	0.795433
11	5539938	rs317777	11	5534276	rs10742697	0.626493
			11	5528177	rs317781	0.747589
11	5528177	rs317781	11	5534276	rs10742697	0.62379
			11	5539938	rs317777	0.747589
			11	5518156	rs372091	0.759029
11	4478095	rs331532	11	4469624	rs58919515	0.615355
			11	4467790	rs73432758	0.634332
			11	4466869	rs12286769	0.795759
			11	4485426	rs35390334	0.974205
11	4485426	rs35390334	11	4478095	rs331532	0.974205
11	5518156	rs372091	11	5534276	rs10742697	0.611418
			11	5528177	rs317781	0.759029
4	4538898	rs4689878	4	4534660	rs59993629	0.643937
			4	4523198	rs16835830	0.832119
11	5608295	rs4910572	11	5622664	rs4910823	0.717434
			11	5597953	rs10684957	0.888313
11	5622664	rs4910823	11	5608295	rs4910572	0.717434
			11	5597953	rs10684957	0.719262
11	5230907	rs7120391	11	5228708	rs10837582	0.857533
			11	5223920	rs11036227	0.860172
			11	5223750	rs9667878	0.996771
14	65691545	rs7160062	14	65692094	rs10143368	0.607693
11	4702838	rs73388885	11	4709585	rs1072894	0.623072
			11	4711986	rs11033350	0.731805
11	4594703	rs73395847	11	4594230	rs3064113	0.760913
			11	4605195	rs2566255	0.785075
11	5271739	rs73402629	11	5264146	rs2071348	0.780447
			11	5273060	rs73402631	0.982627
11	4911564	rs73405021	11	4909000	rs2595982	0.70027
			11	4923993	rs73405065	0.979594
11	4923993	rs73405065	11	4909000	rs2595982	0.711269
			11	4911564	rs73405021	0.979594
11	4460398	rs73422049	11	4466869	rs12286769	0.635016
			11	4469624	rs58919515	0.855098
			11	4467790	rs73432758	0.864261
11	5221233	rs7933549	11	5208438	rs74370727	0.841043
			11	5206797	rs78129990	0.846095
			11	5198678	rs74234647	0.846978
			11	5223920	rs11036227	0.854457
			11	5228708	rs10837582	0.855421
			11	5223750	rs9667878	0.996802
11	5192520	rs80034548	11	5206797	rs78129990	0.843706
			11	5198678	rs74234647	0.84459
			11	5208438	rs74370727	0.84459
11	5223750	rs9667878	11	5208438	rs74370727	0.843873
			11	5223920	rs11036227	0.857211
			11	5228708	rs10837582	0.858279
			11	5230907	rs7120391	0.996771
			11	5221233	rs7933549	0.996802

## Sheet: Top SNPs in cases with stroke
SNPs associated with stroke (n=27) in SCD among the Saudis											Note:
CHR	SNP	BP	A1	Cases	Controls	A2	CHISQ	P	OR		Red colour SNPs were detected in all TEE cases too
12	rs116252602	42125688	G	0.1	0.001767	A	45.96	1.205e-11	62.78
8	rs11785309	4197915	C	0.5	0.1413	T	44.41	2.666e-11	6.075
11	rs317777	5539938	A	0.7407	0.2958	G	43.87	3.517e-11	6.803
11	rs372091	5518156	A	0.7407	0.2975	G	43.42	4.426e-11	6.746
9	rs113548394	118476352	G	0.07407	0	A	42.49	7.088e-11	NA
9	rs4837102	129409062	A	0.1481	0.01056	C	42.43	7.337e-11	16.29
11	rs147062602	5364542	-	0.7407	0.3028	CAGCCCCAGGTCTGTGG	42.09	8.703e-11	6.578
11	rs4525262	5722444	C	0.8462	0.3865	A	41.15	1.41e-10	8.729
11	rs4910823	5622664	G	0.09259	0.5387	A	39.26	3.709e-10	0.08737
11	rs73395847	4594703	T	0.7593	0.3351	C	38	7.081e-10	6.258
11	rs10684957	5597953	TT	0.8704	0.4329	-	37.87	7.554e-10	8.797
11	rs317781	5528177	C	0.8333	0.4014	A	37.36	9.842e-10	7.456
11	rs9971583	5735417	C	0.7222	0.3088	T	37.34	9.939e-10	5.82
11	rs73388885	4702838	A	0.7778	0.3539	G	37.22	1.053e-09	6.391
11	rs7936392	5973169	G	0.6852	0.2835	A	36.68	1.395e-09	5.502
11	rs10742697	5534276	A	0.8889	0.4595	C	36.37	1.634e-09	9.41
11	rs80034548	5192520	C	0.8654	0.4316	G	36.02	1.953e-09	8.467
11	rs12362690	6025297	C	0.6481	0.2596	T	35.92	2.055e-09	5.252
11	rs117983699	6090732	T	0.537	0.186	C	35.86	2.121e-09	5.078
11	rs331532	4478095	A	0.8333	0.4117	G	35.44	2.632e-09	7.146
11	rs1389463	4729164	T	0.05769	0.4859	C	35.28	2.856e-09	0.06479
11	rs35390334	4485426	T	0.8462	0.419	C	35.05	3.21e-09	7.626
8	rs11136467	2062246	G	0.4815	0.1561	T	34.73	3.786e-09	5.018
11	rs2071348	5264146	G	0.09259	0.5107	T	34.54	4.186e-09	0.09776
11	rs1455957	5127136	G	0.1111	0.5281	A	34.31	4.695e-09	0.1117
11	rs4910572	5608295	A	0.1111	0.5281	G	34.31	4.695e-09	0.1117
11	rs12279795	6006888	G	0.6667	0.2807	A	34.11	5.215e-09	5.125
11	rs73405065	4923993	T	0.8148	0.4028	G	33.98	5.568e-09	6.523
11	rs74370727	5208438	A	0.07407	0.4859	G	33.78	6.186e-09	0.08465
2	rs72817050	100271545	G	0.07692	0.001754	A	33.77	6.214e-09	47.42
14	rs528262343	75538258	G	0.07692	0.001754	-	33.77	6.214e-09	47.42
15	rs75556725	96536982	C	0.07692	0.001754	G	33.77	6.214e-09	47.42
11	rs74234647	5198678	T	0.07407	0.4841	C	33.51	7.096e-09	0.08526
11	rs2657160	4588351	G	0.8333	0.4228	A	33.49	7.181e-09	6.826
11	rs78129990	5206797	G	0.07407	0.4821	A	33.19	8.364e-09	0.08593
23	rs17250653	54927047	T	0.1053	0.002451	C	33.15	8.54e-09	47.88
13	rs79787161	101806563	C	0.4815	0.1608	T	33.12	8.676e-09	4.847
11	rs1368823	4871506	T	0.07407	0.4806	C	32.98	9.316e-09	0.08647
11	rs10838605	5771758	A	0.7692	0.3635	G	32.72	1.063e-08	5.837
11	rs325687	6179462	C	0.7778	0.3772	T	32.68	1.088e-08	5.779
11	rs3064113	4594230	ATTT	0.8333	0.4278	-	32.61	1.124e-08	6.687
11	rs188149923	6260499	A	0.5	0.1738	G	32.51	1.187e-08	4.755
3	rs115005833	107262645	G	0.07407	0.001754	A	32.46	1.219e-08	45.52
4	rs148053242	125420922	C	0.07407	0.001754	A	32.46	1.219e-08	45.52
8	rs77365846	144826962	T	0.07407	0.001754	C	32.46	1.219e-08	45.52
12	rs143446685	5911166	T	0.07407	0.001754	C	32.46	1.219e-08	45.52
23	rs147223830	95298498	A	0.07895	0	C	32.43	1.236e-08	NA
23	rs111627375	4662984	T	0.07895	0	C	32.35	1.288e-08	NA
11	rs61870735	11954758	G	0.07407	0.001761	A	32.34	1.295e-08	45.36
11	rs73422049	4460398	C	0.7222	0.3322	T	32.32	1.308e-08	5.228
5	rs111792445	35635148	A	0.07407	0.001767	G	32.22	1.377e-08	45.2
11	rs967664	5587409	T	0.1111	0.5141	G	32.09	1.476e-08	0.1181
14	rs55697089	78037199	C	0.2407	0.04577	T	31.89	1.628e-08	6.61
1	rs78282833	223236132	T	0.05556	0	G	31.82	1.692e-08	NA
12	rs17833674	13836059	C	0.05556	0	T	31.82	1.692e-08	NA
17	rs141323054	62251033	-	0.05556	0	C	31.82	1.692e-08	NA
11	rs10837582	5228708	G	0.09259	0.4929	A	31.79	1.718e-08	0.105
2	rs77026787	74526813	T	0.05556	0	C	31.71	1.791e-08	NA
6	rs139813598	135946600	T	0.05556	0	C	31.71	1.791e-08	NA
8	rs78862391	120917708	G	0.05556	0	A	31.71	1.791e-08	NA
11	rs113093792	67090213	A	0.05556	0	G	31.71	1.791e-08	NA
12	rs114532115	18807437	T	0.05556	0	C	31.71	1.791e-08	NA
20	rs149409222	15351277	T	0.05556	0	C	31.6	1.897e-08	NA
11	rs7109036	4766299	T	0.7963	0.3996	C	31.58	1.912e-08	5.872
11	rs12224171	4811083	A	0.8148	0.4167	G	31.55	1.948e-08	6.16
9	rs62624977	37761961	C	0.05556	0	A	31.49	2.009e-08	NA
11	rs73405021	4911564	G	0.7963	0.4014	A	31.28	2.239e-08	5.829
11	rs12286769	4466869	C	0.8519	0.4542	T	31.2	2.325e-08	6.909
11	rs11035718	5130337	A	0.8333	0.4362	G	31.2	2.327e-08	6.463
11	rs12800414	5005327	T	0.8519	0.4561	C	30.91	2.706e-08	6.856
11	rs11033350	4711986	C	0.8333	0.4384	T	30.86	2.773e-08	6.406
11	rs2566255	4605195	G	0.8077	0.4085	C	30.79	2.877e-08	6.083
11	rs7120391	5230907	C	0.8333	0.4395	T	30.65	3.093e-08	6.377
11	rs7933549	5221233	A	0.8333	0.4399	G	30.6	3.172e-08	6.365
11	rs9667878	5223750	T	0.8333	0.4404	C	30.55	3.251e-08	6.355
11	rs114508525	4542709	C	0.7037	0.3263	A	30.53	3.288e-08	4.903
11	rs7935564	5718517	G	0.7593	0.3732	A	30.45	3.424e-08	5.296
8	rs1566860	4181781	G	0.4444	0.1474	A	30.42	3.485e-08	4.629
11	rs11036227	5223920	T	0.09259	0.4825	C	30.31	3.685e-08	0.1095
23	rs17282067	138973576	C	0.1316	0.007389	T	30.29	3.722e-08	20.35
11	rs73427713	4516892	A	0.7037	0.3292	G	29.95	4.431e-08	4.839
12	rs117638794	95348793	A	0.1111	0.008772	G	29.83	4.711e-08	14.12
1	rs17584748	239623704	C	0.09259	0.005263	T	29.72	4.982e-08	19.29
11	rs7933187	4741954	G	0.1296	0.5175	A	29.72	4.989e-08	0.1388

## Sheet: Top SNPs in TEE cases
SNPs associated with TEE cases (n=65) in SCD among the Saudis
CHR	SNP	BP	A1	F_A	F_U	A2	CHISQ	P	OR
20	rs139341092	48378634	CTCA	0.2769	0.09331	-	32.06	1.496e-08	3.721
11	rs35390334	4485426	T	0.6953	0.4193	C	31.97	1.567e-08	3.16
11	rs331532	4478095	A	0.6846	0.4117	G	31.68	1.815e-08	3.102
11	rs317777	5539938	A	0.5538	0.2958	G	31.23	2.294e-08	2.956
11	rs147062602	5364542	-	0.5615	0.3028	CAGCCCCAGGTCTGTGG	31.08	2.47e-08	2.949
11	rs372091	5518156	A	0.5538	0.2975	G	30.74	2.945e-08	2.931
9	rs76076035	14943233	C	0.3462	0.1404	T	30.57	3.227e-08	3.243
11	rs4910823	5622664	G	0.2769	0.5389	A	29.03	7.136e-08	0.3277
8	rs11785309	4197915	C	0.3385	0.1413	T	28.05	1.179e-07	3.108
11	rs73395847	4594703	T	0.5846	0.3351	C	27.94	1.254e-07	2.793
11	rs10684957	5597953	TT	0.6846	0.4329	-	26.85	2.204e-07	2.844
10	rs12412726	109677589	A	0.2462	0.08596	G	26.55	2.573e-07	3.472
5	rs6554634	1186121	A	0.4308	0.213	G	26.5	2.638e-07	2.796
11	rs80034548	5192520	C	0.6797	0.4296	G	26.2	3.077e-07	2.818
11	rs4910572	5608295	A	0.2812	0.5299	G	25.87	3.66e-07	0.3471
17	rs111681839	79176142	G	0.05385	0.001761	A	25.33	4.83e-07	32.27
11	rs1368823	4871506	T	0.2385	0.4806	C	25.21	5.147e-07	0.3385
11	rs1455957	5127136	G	0.2846	0.5281	A	25.13	5.37e-07	0.3556
11	rs73388885	4702838	A	0.5923	0.3539	G	25.1	5.457e-07	2.653
10	rs61246605	111450164	T	0.3923	0.189	G	24.89	6.067e-07	2.769
14	rs7160062	65691545	G	0.3154	0.1356	A	24.35	8.028e-07	2.938
17	rs12938069	25490374	T	0.375	0.1773	C	24.25	8.457e-07	2.784
21	rs73189215	33158443	A	0.1077	0.0193	G	24.02	9.549e-07	6.133
21	rs12482716	33207694	T	0.08462	0.01071	C	23.98	9.743e-07	8.535
11	rs7933549	5221233	A	0.6769	0.4399	G	23.77	1.083e-06	2.667
11	rs73405065	4923993	T	0.6385	0.4028	G	23.75	1.098e-06	2.618
17	rs62071691	3790498	A	0.3	0.1268	G	23.74	1.103e-06	2.952
11	rs73422049	4460398	C	0.5615	0.3322	T	23.73	1.106e-06	2.575
11	rs9667878	5223750	T	0.6769	0.4404	C	23.72	1.113e-06	2.663
11	rs73402629	5271739	A	0.625	0.3907	C	23.27	1.41e-06	2.599
11	rs11035718	5130337	A	0.6692	0.4362	G	22.99	1.627e-06	2.615
11	rs4525262	5722444	C	0.6172	0.3865	A	22.66	1.937e-06	2.559
11	rs7120391	5230907	C	0.6719	0.4395	T	22.55	2.053e-06	2.611
11	rs73405021	4911564	G	0.6308	0.4014	A	22.54	2.056e-06	2.548
11	rs317781	5528177	C	0.6308	0.4014	A	22.54	2.056e-06	2.548
2	rs77791090	67182098	A	0.06923	0.007018	G	22.48	2.124e-06	10.52
5	rs146204891	10684319	A	0.03906	0	G	22.43	2.184e-06	NA
7	rs1174864	53127559	A	0.6875	0.456	G	22.4	2.219e-06	2.625
9	rs35504021	342424	A	0.2462	0.4735	G	22.28	2.356e-06	0.3631
19	rs2195959	5419295	T	0.2109	0.4366	G	22.26	2.38e-06	0.3449
8	rs1566860	4181781	G	0.3231	0.1474	A	22.14	2.532e-06	2.761
1	rs78282833	223236132	T	0.03846	0	G	22.08	2.614e-06	NA
3	rs142991893	21824346	T	0.03846	0	C	22.08	2.614e-06	NA
11	rs114508525	4542709	C	0.5462	0.3263	A	22.02	2.701e-06	2.484
6	rs145017319	34204171	G	0.03846	0	C	22	2.721e-06	NA
6	rs139813598	135946600	T	0.03846	0	C	22	2.721e-06	NA
14	rs74993202	94826680	T	0.03846	0	G	22	2.721e-06	NA
6	rs141682404	163457196	C	0.1077	0.0212	T	21.99	2.738e-06	5.572
11	rs73402631	5273060	C	0.6231	0.3975	G	21.83	2.978e-06	2.505
11	rs10742697	5534276	C	0.3125	0.5405	A	21.72	3.155e-06	0.3864
11	rs2213170	5303033	A	0.6231	0.3982	G	21.72	3.16e-06	2.498
4	rs148754666	1489496	A	0.06154	0.005263	G	21.67	3.231e-06	12.39
8	rs16904858	134243248	T	0.06154	0.005263	C	21.67	3.231e-06	12.39
11	rs146598024	21172024	T	0.06154	0.005263	G	21.67	3.231e-06	12.39
11	rs2071348	5264146	G	0.2846	0.5107	T	21.66	3.251e-06	0.3812
20	rs6050469	2575369	A	0.06154	0.0053	G	21.5	3.547e-06	12.31
11	rs2599587	4409191	C	0.6308	0.407	A	21.43	3.678e-06	2.489
11	rs73427713	4516892	A	0.5462	0.3292	G	21.37	3.796e-06	2.452
9	rs7026337	87568014	A	0.09231	0.01579	G	21.3	3.93e-06	6.339
11	rs116926964	72544356	G	0.09231	0.01579	T	21.3	3.93e-06	6.339
8	rs36030093	138790371	C	0.5	0.2898	T	21.17	4.208e-06	2.451
10	rs80335688	90949251	G	0.05385	0.003509	T	21.13	4.283e-06	16.16
11	rs11033350	4711986	C	0.6615	0.4384	T	21.11	4.344e-06	2.504
8	rs76943659	132871535	A	0.04615	0.001754	G	21.08	4.408e-06	27.53
8	rs77365846	144826962	T	0.04615	0.001754	C	21.08	4.408e-06	27.53
12	rs144380647	119301057	-	0.04615	0.001761	CT	21	4.594e-06	27.44
11	rs12286769	4466869	C	0.6769	0.4542	T	20.99	4.623e-06	2.518
1	rs143728459	8242919	A	0.04615	0.001767	G	20.92	4.788e-06	27.34
5	rs111792445	35635148	A	0.04615	0.001767	G	20.92	4.788e-06	27.34
13	rs9332032	49079784	G	0.04615	0.001767	A	20.92	4.788e-06	27.34
6	rs72981995	142274618	A	0.07692	0.01053	C	20.89	4.853e-06	7.833
11	rs967664	5587409	T	0.2923	0.5142	G	20.87	4.924e-06	0.3903
